# Supplementary material for: Perioperative Safety in the Longitudinal Assessment of Bariatric Surgery
Source: Atypon-hosted journal article supplement (doi:10.1056/nejmoa0901836), 2009-07-29
Supplement: nejm_labs_445sa1.pdf [file nejm_labs_445sa1.pdf]

## Supplementary Appendix

This appendix has been provided by the authors to give readers additional information about their work.

Supplement to: The Longitudinal Assessment of Bariatric Surgery (LABS) Consortium. Perioperative safety in the longitudinal assessment of bariatric surgery. *N Engl J Med* 2009;361:445-54.

**Supplemental Table 1: Baseline Health Status of LABS-1 Participants**

|                                                          | Total*<br>(N=4776) | LAGB<br>(N=1198) | LRYGB<br>(N=2975) | ORYGB<br>(N=437) | SG<br>(N=117) | BPD-DS<br>(N=47) | p value** |
|----------------------------------------------------------|--------------------|------------------|-------------------|------------------|---------------|------------------|-----------|
| Hypertension, n (%)                                      | 2630 (55.1)        | 628 (52.4)       | 1651 (55.5)       | 248 (56.8)       | 75 (64.1)     | 26 (55.3)        | 0.09      |
| Multiple medication                                      | 1172 (45.2)        | 286 (46.1)       | 732 (44.9)        | 104 (43.3)       | 38 (52.8)     | 11 (42.3)        | 0.70      |
| missing, n                                               | 39                 | 7                | 21                | 8                | 3             | 0                |           |
| Diabetes, n (%)                                          | 1587 (33.2)        | 309 (25.8)       | 1064 (35.8)       | 162 (37.1)       | 38 (32.5)     | 13 (27.7)        | <0.001    |
| Diabetes medication:                                     |                    |                  |                   |                  |               |                  | 0.002     |
| No diabetes medication                                   | 231 (14.6)         | 39 (12.6)        | 170 (16.0)        | 18 (11.1)        | 4 (10.5)      | 0 (0.0)          |           |
| Single oral medication                                   | 486 (30.7)         | 106 (34.3)       | 331 (31.2)        | 32 (19.8)        | 15 (39.5)     | 4 (30.8)         |           |
| Multiple oral medication                                 | 405 (25.6)         | 86 (27.8)        | 262 (24.7)        | 43 (26.5)        | 8 (21.1)      | 6 (46.2)         |           |
| Insulin (w/ or w/o oral meds)                            | 461 (29.1)         | 78 (25.2)        | 299 (28.2)        | 69 (42.6)        | 11 (28.9)     | 3 (23.1)         |           |
| missing, n                                               | 2                  | 0                | 2                 | 0                | 0             | 0                |           |
| Congestive heart failure, n (%)                          | 103 (2.2)          | 34 (2.8)         | 55 (1.9)          | 13 (3.0)         | 1 (0.9)       | 0 (0.0)          | 0.12      |
| Asthma, n (%)                                            | 1104 (23.1)        | 251 (21.0)       | 705 (23.7)        | 108 (24.7)       | 31 (26.5)     | 9 (19.1)         | 0.24      |
| Cannot walk 200 ft, n (%)                                | 86 (1.8)           | 25 (2.1)         | 39 (1.3)          | 18 (4.1)         | 4 (3.4)       | 0 (0.0)          | <0.001    |
| missing, n                                               | 3                  | 2                | 1                 | 0                | 0             | 0                |           |
| History of DVT or PE, n (%)                              | 166 (3.5)          | 35 (2.9)         | 105 (3.5)         | 19 (4.3)         | 5 (4.3)       | 2 (4.3)          | 0.66      |
| Sleep apnea, n (%)                                       | 2334 (48.9)        | 535 (44.7)       | 1502 (50.5)       | 220 (50.3)       | 54 (46.2)     | 23 (48.9)        | 0.02      |
| CPAP, n (%)                                              | 1914 (82.0)        | 447 (83.6)       | 1227 (81.7)       | 181 (82.3)       | 42 (77.8)     | 17 (73.9)        | 0.62      |
| Supplemental O <sub>2</sub> dependent, n (%)             | 81 (3.5)           | 14 (2.6)         | 56 (3.7)          | 5 (2.3)          | 6 (11.1)      | 0 (0.0)          | 0.01      |
| missing, n                                               | 5                  | 0                | 5                 | 0                | 0             | 0                |           |
| Ischemic heart disease, n (%)                            | 209 (4.4)          | 71 (5.9)         | 113 (3.8)         | 17 (3.9)         | 6 (5.1)       | 2 (4.3)          | 0.05      |
| Pulmonary hypertension, n (%)                            | 56 (1.2)           | 15 (1.3)         | 28 (0.9)          | 7 (1.6)          | 4 (3.4)       | 2 (4.3)          | 0.03      |
| Venous edema w/ulcerations***, n (%)                     | 180 (4.0)          | 25 (2.1)         | 96 (3.4)          | 48 (13.4)        | 8 (7.0)       | 3 (6.7)          | <0.001    |
| missing, n                                               | 294                | 21               | 189               | 78               | 3             | 2                |           |
| Number of comorbidities, n (%)                           |                    |                  |                   |                  |               |                  | <0.001    |
| Median (25 <sup>th</sup> , 75 <sup>th</sup> percentiles) | 2 (1.3)            | 1 (1.2)          | 2 (1.3)           | 2 (1.3)          | 2 (1.3)       | 2 (1.2)          | <0.001    |
| 1 or more                                                | 3921 (82.1)        | 926 (77.4)       | 2481 (83.4)       | 373 (85.4)       | 100 (85.5)    | 39 (83.0)        |           |
| 2 or more                                                | 2574 (53.9)        | 566 (47.3)       | 1638 (55.1)       | 272 (62.2)       | 72 (61.5)     | 25 (53.2)        |           |
| 3 or more                                                | 1263 (26.5)        | 269 (22.5)       | 811 (27.3)        | 140 (32.0)       | 33 (28.2)     | 10 (21.3)        |           |
| 4 or more                                                | 473 (9.9)          | 103 (8.6)        | 298 (10.0)        | 54 (12.4)        | 14 (12.0)     | 4 (8.5)          |           |
| missing, n                                               | 3                  | 2                | 1                 | 0                | 0             | 0                |           |
| Medications in last 90 days:                             |                    |                  |                   |                  |               |                  |           |
| Beta-blocker, n (%)                                      | 844 (17.9)         | 202 (16.9)       | 508 (17.4)        | 104 (23.9)       | 24 (20.5)     | 5 (10.9)         | 0.007     |
| missing, n                                               | 67                 | 6                | 58                | 2                | 0             | 1                |           |
| Statin/lipid-lowering agent, n (%)                       | 1271 (26.6)        | 302 (25.2)       | 793 (26.7)        | 116 (26.5)       | 41 (35.0)     | 18 (38.3)        | 0.07      |
| Therapeutic anticoagulant, n (%)                         | 212 (4.4)          | 48 (4.0)         | 118 (4.0)         | 37 (8.5)         | 8 (6.8)       | 1 (2.1)          | <0.001    |
| Narcotic, n (%)                                          | 770 (16.1)         | 175 (14.6)       | 473 (15.9)        | 106 (24.3)       | 12 (10.3)     | 3 (6.4)          | <0.001    |
| Anti-depressant, n (%)                                   | 1880 (39.9)        | 429 (36.0)       | 1195 (41.0)       | 194 (44.6)       | 40 (34.2)     | 20 (43.5)        | 0.005     |
| missing, n                                               | 67                 | 6                | 58                | 2                | 0             | 1                |           |

Abbreviations: LRYGB = laparoscopic roux-en-y gastric bypass, ORYGB = open roux-en-y gastric bypass; LAGB= laparoscopic adjustable gastric banding; SG=sleeve gastrectomy; BPD-DS = biliopancreatic diversion with or without a duodenal switch

\*Includes 1 VBG and 1 OAGB cases.

\*\* Chi-square test for categorical variables, Kruskal-Wallis test for continuous variables

\*\*\* A history of venous edema with ulcerations was not collected at start of study and is therefore missing for 6.1% of participants and not included in count of comorbidities for those patients.

**Supplemental Table 2:** Risk of 30-day Composite Endpoint (death/DVT/PE/intervention/no discharge) by Patient Characteristics (n=4610) with and without adjustment.

| Patient Characteristics             | Group                 | n    | Incidence<br>n (%) | Unadjusted*      |       | Adjusted<br>(n=4607)***               |                                               |
|-------------------------------------|-----------------------|------|--------------------|------------------|-------|---------------------------------------|-----------------------------------------------|
|                                     |                       |      |                    | OR (95% CI)      | p     | OR (95% CI)                           | p                                             |
| Age categories (yrs)                |                       |      |                    |                  | 0.98  |                                       |                                               |
|                                     | <30                   | 491  | 15(3.1)            | 1.00             | --    |                                       |                                               |
|                                     | 30-39                 | 1162 | 48(4.1)            | 1.25(0.69,2.27)  | 0.46  |                                       |                                               |
|                                     | 40-49                 | 1339 | 56(4.2)            | 1.19(0.66,2.14)  | 0.57  |                                       |                                               |
|                                     | 50-59                 | 1156 | 50(4.3)            | 1.26(0.69,2.29)  | 0.45  |                                       |                                               |
|                                     | 60-64                 | 301  | 14(4.7)            | 1.29(0.60,2.74)  | 0.52  |                                       |                                               |
|                                     | 65+                   | 161  | 6(3.7)             | 1.24(0.47,3.32)  | 0.66  |                                       |                                               |
| Age per year                        |                       |      |                    | 1.00(0.99,1.02)  | 0.62  |                                       |                                               |
| BMI (kg/m <sup>2</sup> ) categories |                       |      |                    |                  | 0.04  |                                       |                                               |
|                                     | <40                   | 624  | 23(3.7)            | 1.19(0.74,1.92)  | 0.46  |                                       |                                               |
|                                     | 40- <50               | 2462 | 81(3.3)            | 1.00             | --    |                                       |                                               |
|                                     | 50 - <60              | 1139 | 54(4.7)            | 1.28(0.89,1.84)  | 0.18  |                                       |                                               |
|                                     | 60+                   | 385  | 31(8.1)            | 1.94(1.23,3.05)  | 0.004 |                                       |                                               |
| BMI per 1 kg/m <sup>2</sup>         |                       |      |                    | 1.02(1.01,1.04)  | 0.006 | Effect<br>Demonstrated in<br>Figure 2 | Linear<br>(p=0.38),<br>quadratic<br>(p=0.005) |
| Sex                                 | Female                | 3659 | 146(4.0)           | 1.00             | --    |                                       |                                               |
|                                     | Male                  | 951  | 43(4.5)            | 1.17(0.82,1.67)  | 0.39  |                                       |                                               |
| Race                                | White                 | 499  | 27(5.4)            | 1.00             | --    |                                       |                                               |
|                                     | Black/Other           | 4065 | 161(4.0)           | 1.31(0.84,2.04)  | 0.23  |                                       |                                               |
| Ethnicity                           | Non-Hispanic          | 4330 | 179(4.1)           | 1.00             | --    |                                       |                                               |
|                                     | Hispanic              | 278  | 10(3.6)            | 0.91(0.47,1.78)  | 0.78  |                                       |                                               |
| Hypertension                        | No                    | 2083 | 84(4.0)            | 1.00             | --    |                                       |                                               |
|                                     | Yes                   | 2527 | 105(4.2)           | 0.96(0.71,1.29)  | 0.78  |                                       |                                               |
| Diabetes                            | No                    | 3075 | 104(3.4)           | 1.00             | --    |                                       |                                               |
|                                     | Yes                   | 1535 | 85(5.5)            | 1.46(1.08,1.98)  | 0.02  |                                       |                                               |
| Congestive heart failure            | No                    | 4508 | 182(4.0)           | 1.00             | --    |                                       |                                               |
|                                     | Yes                   | 102  | 7(6.9)             | 1.48(0.66,3.33)  | 0.34  |                                       |                                               |
| Asthma                              | No                    | 3546 | 138(3.9)           | 1.00             | --    |                                       |                                               |
|                                     | Yes                   | 1064 | 51(4.8)            | 1.13(0.81,1.59)  | 0.47  |                                       |                                               |
| Functional status                   | Can walk 200 ft       | 4525 | 176(3.9)           | 1.00             | --    | 1.00                                  | --                                            |
|                                     | Can not walk 200 feet | 82   | 13(15.9)           | 2.93(1.5,5.72)   | 0.001 | 2.24(1.08,4.64)                       | 0.03                                          |
| DVT/VTE                             | No                    | 4451 | 175(3.9)           | 1.00             | --    | 1.00                                  | -                                             |
|                                     | Yes                   | 159  | 14(8.8)            | 2.28(1.28,4.09)  | 0.006 | 2.07(1.14,3.75)                       | 0.02                                          |
| Sleep apnea                         | No                    | 2354 | 77(3.3)            | 1.00             | --    | 1.00                                  | -                                             |
|                                     | Yes                   | 2256 | 112(5.0)           | 1.49(1.08,2.05)  | 0.02  | 1.37(0.99,1.91)                       | 0.06                                          |
| Ischemic heart disease              | No                    | 4409 | 181(4.1)           | 1.00             | --    |                                       |                                               |
|                                     | Yes                   | 201  | 8(4.0)             | 0.94(0.45,1.96)  | 0.87  |                                       |                                               |
| Pulmonary hypertension              | No                    | 4561 | 186(4.1)           | 1.00             | --    |                                       |                                               |
|                                     | Yes                   | 49   | 3(6.1)             | 1.17(0.35,3.95)  | 0.80  |                                       |                                               |
| Venous edema with ulcerations       | No                    | 4441 | 174(3.9)           | 1.00             | --    |                                       |                                               |
|                                     | Yes                   | 169  | 15(8.9)            | 1.61(0.9,2.88)   | 0.11  |                                       |                                               |
| Number of comorbidities             |                       |      |                    |                  | 0.02  |                                       |                                               |
|                                     | None                  | 819  | 18(2.2)            | 1.00             | --    |                                       |                                               |
|                                     | 1-2                   | 2561 | 103(4.0)           | 1.74(1.04,2.91)  | 0.04  |                                       |                                               |
|                                     | 3+                    | 1227 | 68(5.5)            | 2.19(1.26,3.8)   | 0.006 |                                       |                                               |
| Surgical procedure                  |                       |      |                    |                  | <.001 |                                       | <.001                                         |
|                                     | LAGB                  | 1198 | 12(1.0)            | 1.00             | --    | 1.00                                  | -                                             |
|                                     | LRYGB                 | 2975 | 143(4.8)           | 4.70(2.54,8.69)  | <.001 | 4.77(2.58,8.84)                       | <.001                                         |
|                                     | ORYGB                 | 437  | 34(7.8)            | 7.36(3.39,15.99) | <.001 | 5.76(2.61,12.75)                      | <.001                                         |

\*Only accounting for site and surgeon

\*\*\*Adjusting for BMI, procedure, functional status, history of sleep apnea, and history of DVT/VTE and accounting for site and surgeon effect. All other variables appeared statistically insignificant and did not improve model fit in the presence of BMI, procedure, functional status, history of sleep apnea, and history of DVT/VTE and thus are removed from the multivariable model.
